# Supplementary material for: Shrinkage Estimation of the Realized Relationship Matrix
Source: PubMed Central journal article supplement (PMC3484671; doi:10.1534/g3.112.004259), 2012-11-01
Supplement: supp_2.11.1405_FigureS1.pdf [file supp_2.11.1405_FigureS1.pdf]

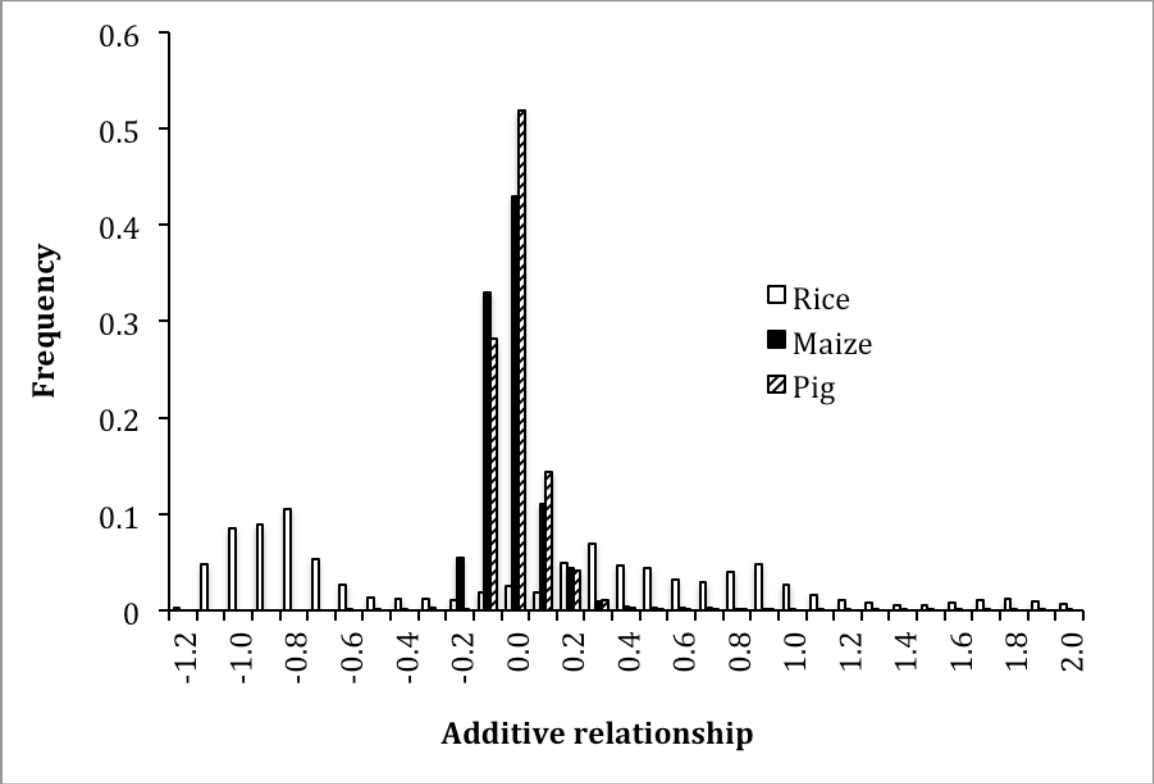

Figure S1 Histograms of the off-diagonal realized relationship coefficients.
