# Supplementary material for: Shrinkage Estimation of the Realized Relationship Matrix
Source: PubMed Central journal article supplement (PMC3484671; doi:10.1534/g3.112.004259), 2012-11-01
Supplement: supp_2.11.1405_FigureS2.pdf [file supp_2.11.1405_FigureS2.pdf]

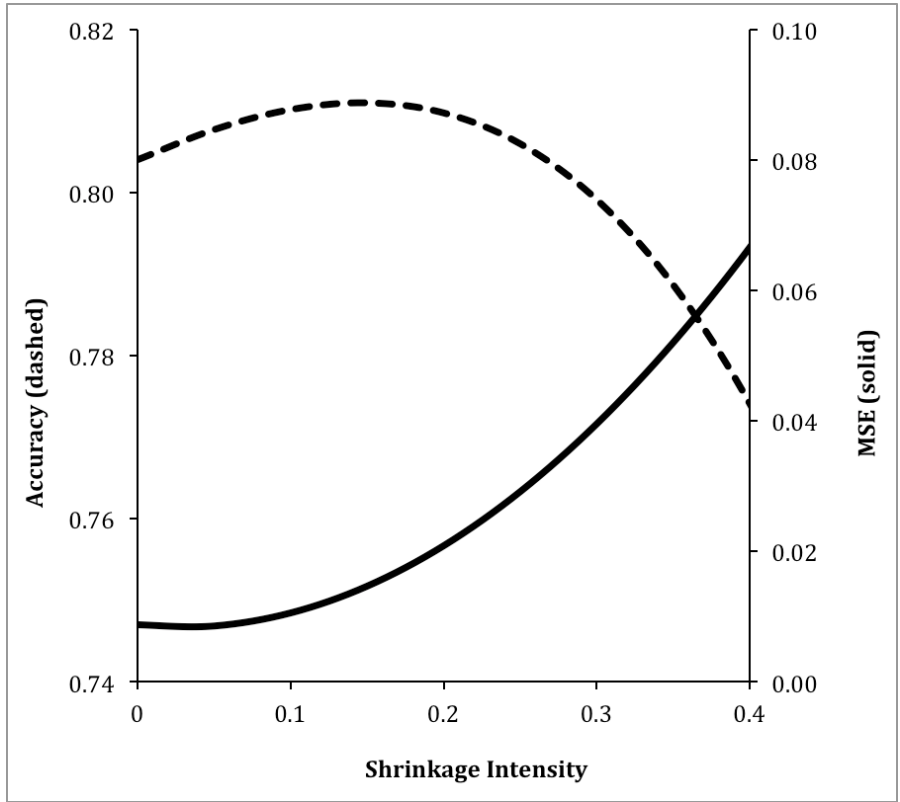

**Figure S2** Maximizing accuracy vs. minimizing MSE for the 2+6-row barley population (see Figure 3 caption).
